# Supplementary material for: Kinetic Model for H2S Adsorption on NiO Surface in Resistive MEMS Gas Sensors: Coupling Mass Transfer, Multisite Adsorption, and Surface Interactions
Source: Royal Society of Chemistry journal article supplement (doi:10.1039/d5cp04688b), 2026-01-01
Supplement: d5cp04688b2.pdf [file d5cp04688b2.pdf]

## Supporting Information

### Kinetic Modeling of H<sub>2</sub>S Adsorption and Desorption on NiO Surfaces in

### Resistive MEMS Gas Sensor: Coupling Mass Transfer, Multisite Adsorption, and Surface Interactions

#### S1. Reaction Mechanism and Kinetic Scheme

The interaction of hydrogen sulfide with the surface involves sequential molecular adsorption and dissociation:

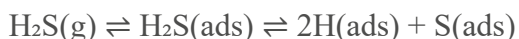

The chemical reaction with nickel oxide proceeds as follows:

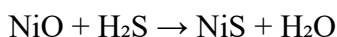

From a kinetic perspective, this corresponds to sequential molecular adsorption and dissociation. A specific feature of the interaction between hydrogen sulfide and nickel oxide is that it is partially irreversible.

#### S2. Analytical Kinetic Model

Consider the adsorption of substance A from the gas phase onto surface P (molecular adsorption):

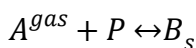

$$[B_s] = C_s * \theta$$

This yields a first-order linear differential equation (LDE):

$$\frac{d\theta}{dt} = k^+ C(1 - \theta) - k^- C_s \theta$$

Then:

$$\theta(t)$$

$$= \frac{k^+ * C}{k^+ * C + k^- * C_s} * \left(1 - e^{-\left(k^+ * C + k^- * C_s\right) * t}\right) = \theta_{eq} * \left(1 - e^{-\left(k^+ * C + k^- * C_s\right) * t}\right)$$

$$\theta_{\infty} = \frac{k^+ * C}{k^+ * C + k^- * C_s} = A$$

$$B = k^+ * C + k^- * C_s$$

The equilibrium degree of coverage  $\theta_{eq}$  corresponds to filling at  $t \rightarrow \infty$ .

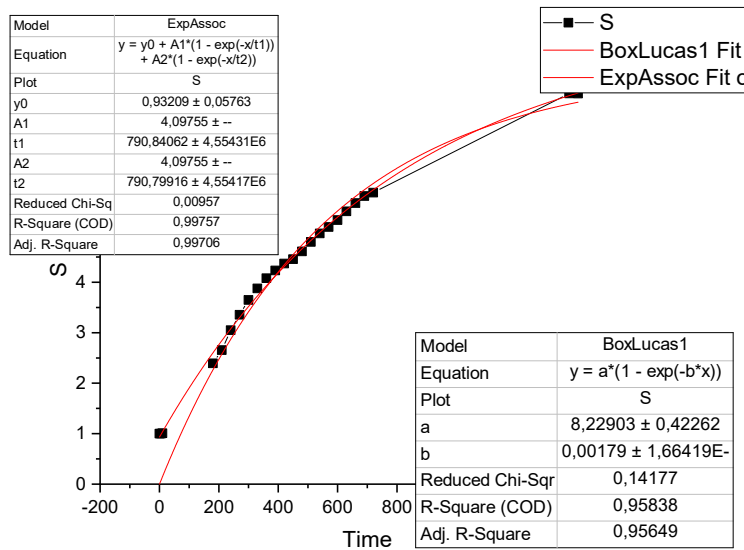

Figure 1. NiO-MEMS type sensor response to 100 ppm of H<sub>2</sub>S

The kinetics of the real response to hydrogen sulfide are described by the molecular adsorption equation with a high correlation coefficient (fig.1). However, a second process is additionally mixed in. Including dissociation in the consideration increases the correlation coefficient.

Including the sensor cleaning region (fig.2) allows modeling the recovery curve under the condition of an exponential decrease in the amount of analyte in the gas phase.

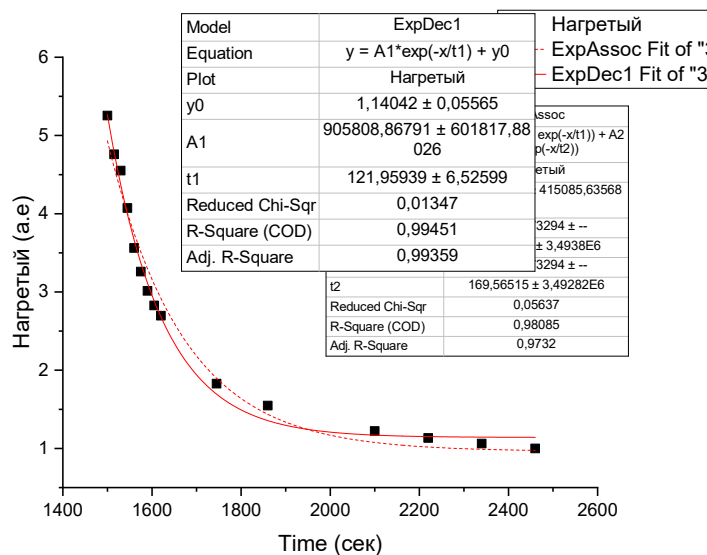

Figure 2. NiO-MEMS type sensor recovery to 100 ppm of H<sub>2</sub>S

For the *competitive adsorption model with concentration-dependent desorption and exponential decrease in gas phase concentration*, desorption will have a *double exponential character*:

Formulation:

1. Exponential decrease in gas concentration:

$$C_{\text{gas}}(t) = C_0 \times \exp(-t/\tau_{\text{gas}})$$

where  $\tau_{\text{gas}}$  is the relaxation time of the gas phase.

2. Concentration-dependent desorption:

$$k_{\text{d}}^{\text{eff}}(t) = k_{\text{d}} \times (1 + \alpha \times C_{\text{gas}}(t)) = k_{\text{d}} \times (1 + \alpha \times C_0 \times \exp(-t/\tau_{\text{gas}}))$$

3. Site occupancy equation:

$$d\theta/dt = k_{\text{a}} \times C_{\text{surface}} \times (1-\theta) - k_{\text{d}}^{\text{eff}}(t) \times \theta$$

Analytical solution for one substance:

$$\theta(t) \approx K_{\text{eff}}(t) / (1 + K_{\text{eff}}(t)), \text{ где } K_{\text{eff}}(t) = k_{\text{a}} \times C_0 \times \exp(-t/\tau_{\text{gas}}) / k_{\text{d}}^{\text{eff}}(t)$$

This creates a characteristic "hump" on the desorption curve.

### S3. Numerical Solution Model

The system describes the kinetics of H<sub>2</sub>S adsorption on NiO, concentration-dependent desorption, and chemical reaction in the gas phase.

Coverages:

$\theta_{\text{A}}$ : Adsorbed H<sub>2</sub>S

$\theta_{\text{R}}$ : NiS product

$\theta_{\text{free}} = 1 - \theta_{\text{A}} - \theta_{\text{R}}$ : Free NiO centers

$P_{\text{H}_2\text{S}}$ : Partial pressure of H<sub>2</sub>S (atm)

$\alpha$ : Lateral interaction coefficient

Initial and Boundary Conditions:

Initial:  $t=0$ ,  $\theta_{\text{A}}(0)=0$ ,  $\theta_{\text{R}}(0)=0$  (clean NiO surface).

Boundary:  $t \rightarrow \infty$ ,  $d\theta_{\text{A}}/dt \rightarrow 0$ ,  $d\theta_{\text{R}}/dt \rightarrow 0$  (equilibrium:  $\theta_{\text{A}}^{\text{eq}} = K P / (1 + K P)$ , where  $K = k_{\text{ads}} / k_{\text{des}}^{\text{eq}}$ ).

Physical constraints:  $0 \leq \theta_{\text{A}} + \theta_{\text{R}} \leq 1 \forall t \geq 0$

Without accounting for concentration-dependent desorption, the model corresponds to *Langmuir-Hinshelwood with interaction*.

#### S4. Kinetic Parameters

Estimated Constants (250°C = 523 K, NiO + H<sub>2</sub>S)

| Constant                 | Value | Unit            | Comment                                                                                     |
|--------------------------|-------|-----------------|---------------------------------------------------------------------------------------------|
| $k_{\text{ads}}$         | 1.2   | s <sup>-1</sup> | H <sub>2</sub> S dissociation on NiO, E <sub>a</sub> approx 120 kJ/mol                      |
| $k_{\text{des}}$         | 0.08  | s <sup>-1</sup> | Base desorption, A = 10 <sup>12</sup> s <sup>-1</sup> , E <sub>des</sub> approx 14\$ kJ/mol |
| $\alpha$                 | 2.5   | -               | Lateral interaction ~10-15 kJ/mol per pair                                                  |
| $k_{\text{rxn}}$         | 0.03  | s <sup>-1</sup> | Sulfidation, E <sub>a</sub> approx 130 kJ/mol by CLC analogy                                |
| $P_{\text{H}_2\text{S}}$ | 0.01  | atm             | Experimental                                                                                |
